# Supplementary material for: Boric acid co-crystals in guar gelation
Source: Royal Society of Chemistry journal article supplement (doi:10.1039/c7ce01858d), 2017-01-01
Supplement: c7ce01858d1.pdf [file c7ce01858d1.pdf]

## Boric Acid Cocrystals in Guar Gelation

Andrea Perrin,<sup>a</sup> Melissa J. Goodwin,<sup>a</sup> Osama M. Musa,<sup>b</sup> Dmitry S. Yufit<sup>a</sup> and Jonathan W. Steed<sup>a\*</sup>

a) Department of Chemistry, Durham University, South Road, Durham DH1 3LE, UK. Email: jon.steed@durham.ac.uk

b) Ashland LLC, 1005 Route 202/206, Bridgewater, NJ 08807, USA. E-mail: omusa@ashland.com

### SUPPLEMENTARY INFORMATION

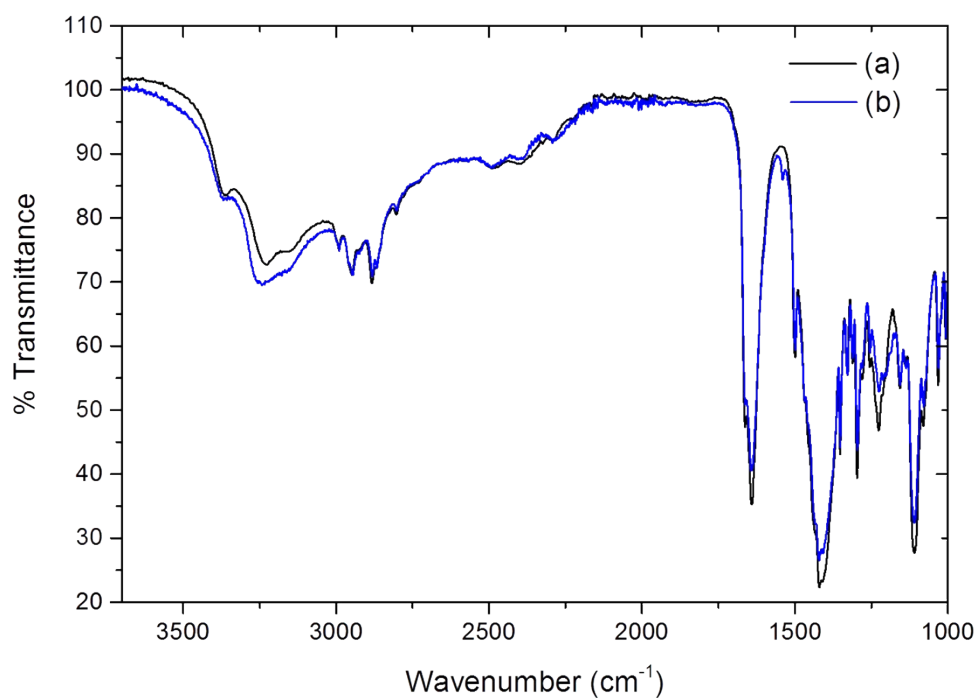

Figure S1: Solid-state IR spectra for (a) single crystals of **1**·2B(OH)<sub>3</sub> grown from ethanol and (b) mechanochemically prepared crystalline solid.

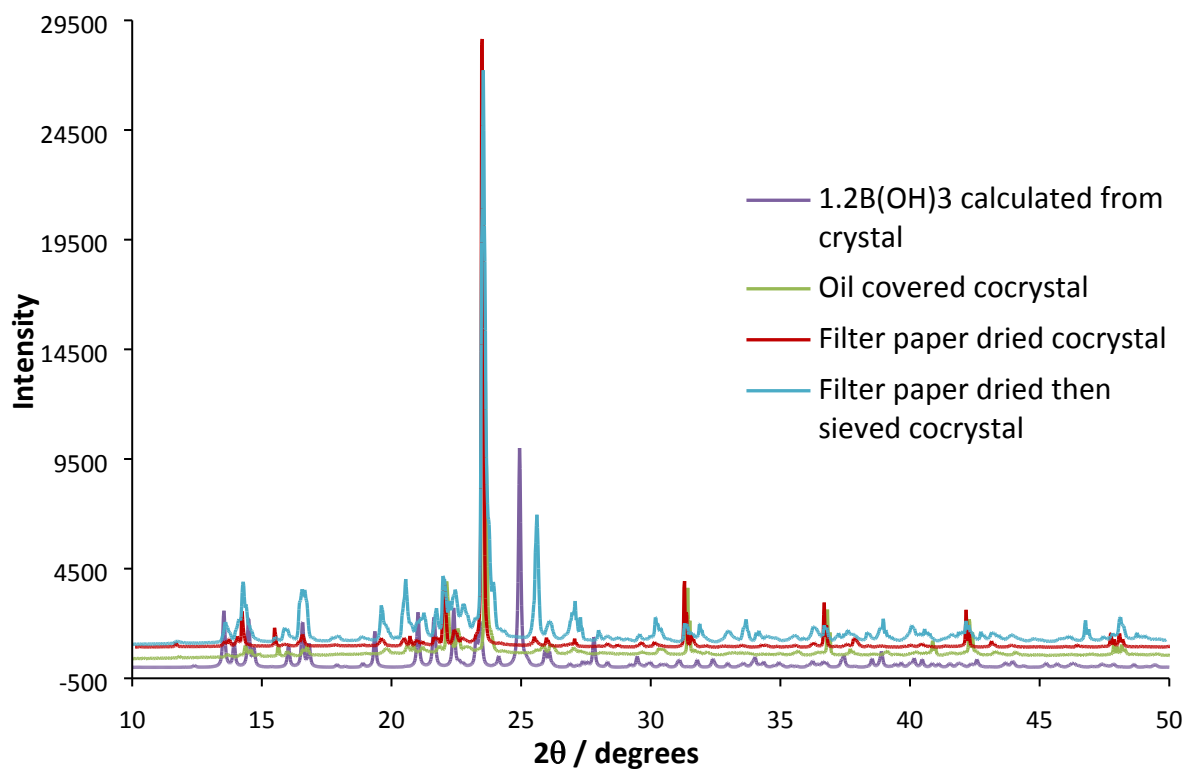

Figure S2. XRPD patterns for  $1 \cdot 2B(OH)_3$  under various conditions and the pattern calculated from the single crystal structure.

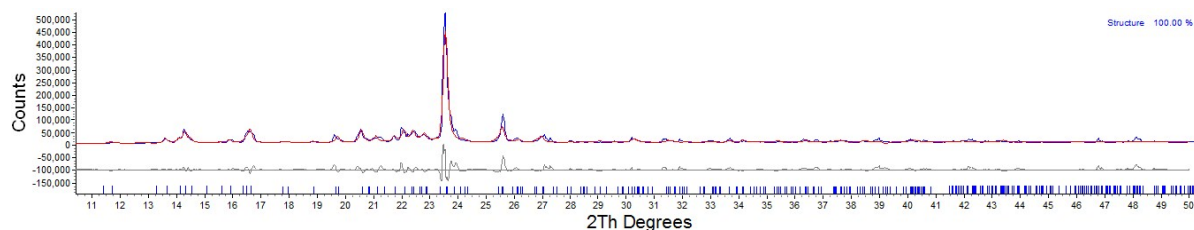

Figure S3. Room temperature Rietveld fit (red) incorporating preferred orientation for the XRPD pattern for  $1 \cdot 2B(OH)_3$  (blue – sample has been dried and sieved). The unit cell by XRPD  $a = 6.9800$ ,  $b = 8.4318$ ,  $c = 17.4944$  Å,  $\alpha = 77.958^\circ$ ,  $\beta = 80.603^\circ$ ,  $\gamma = 68.869^\circ$  is consistent with the solid form at 120 K studied by single crystal X-ray crystallography and DSC indicates no phase change between 120 K and the melting of the sample at  $60^\circ\text{C}$ .

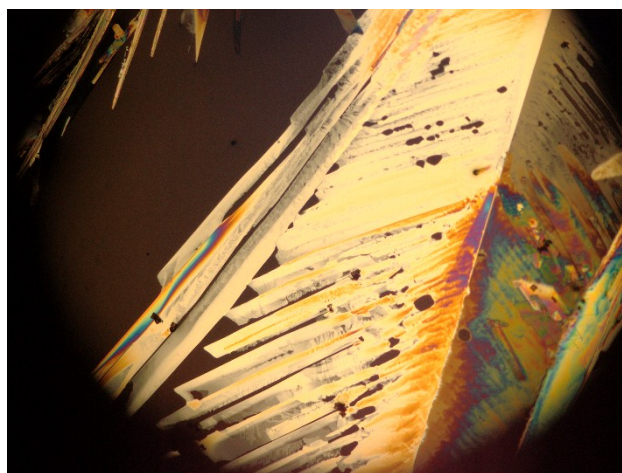

Figure S4. Polarised optical microscope image of crystals of  $1 \cdot 2\text{B(OH)}_3$  showing the blade-like morphology.

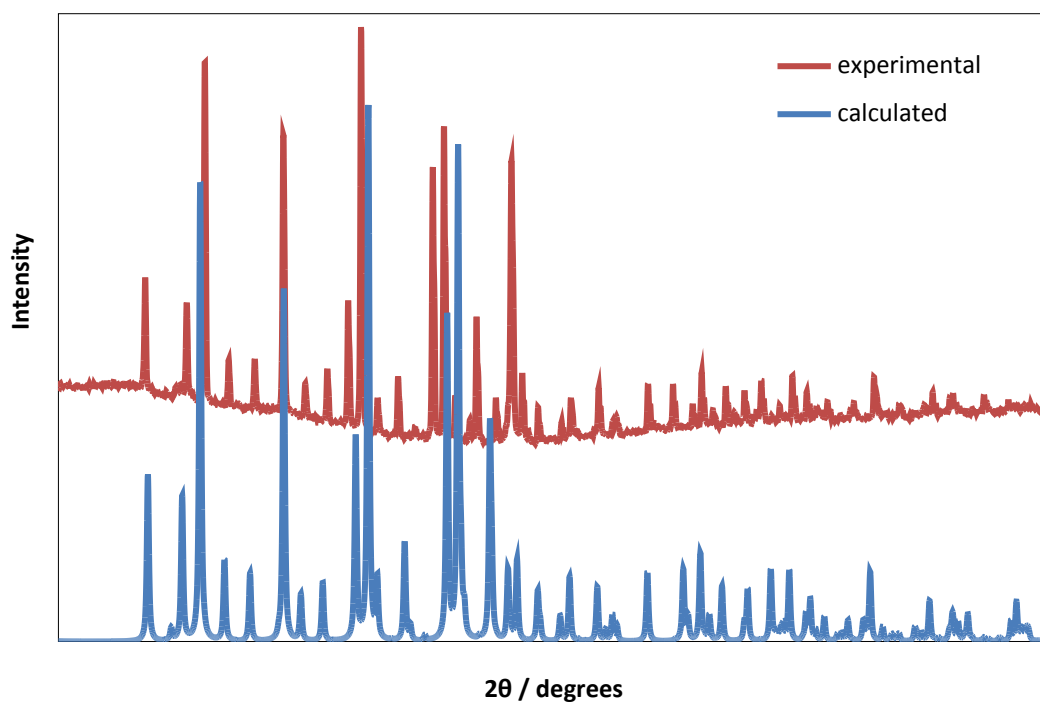

Figure S5. Experimental XRPD pattern of  $2 \cdot \text{B(OH)}_3$  at room temperature and the XRPD pattern calculated from the low temperature single crystal X-ray data.

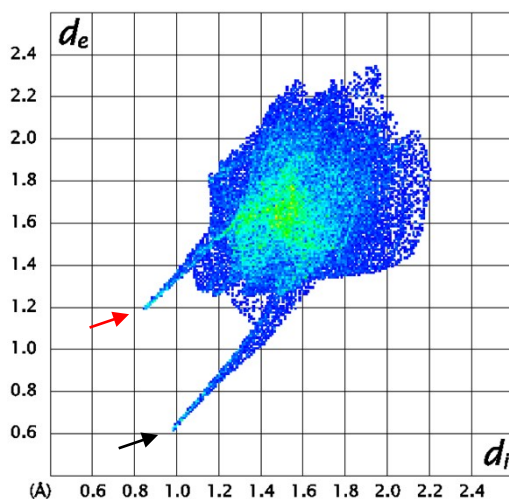

Figure S6. Hirshfeld surface fingerprint plot for the molecule of **2** in  $2 \cdot \text{B}(\text{OH})_3$ . The sharp peaks on the left represent hydrogen bond  $\text{NH} \cdots \text{O}$  donor (red arrow) and  $\text{OH} \cdots \text{O}$  acceptor interactions (black arrow). The small diffuse blue region between the two hydrogen bonding peaks is indicative of a cyclic hydrogen bonding motif.

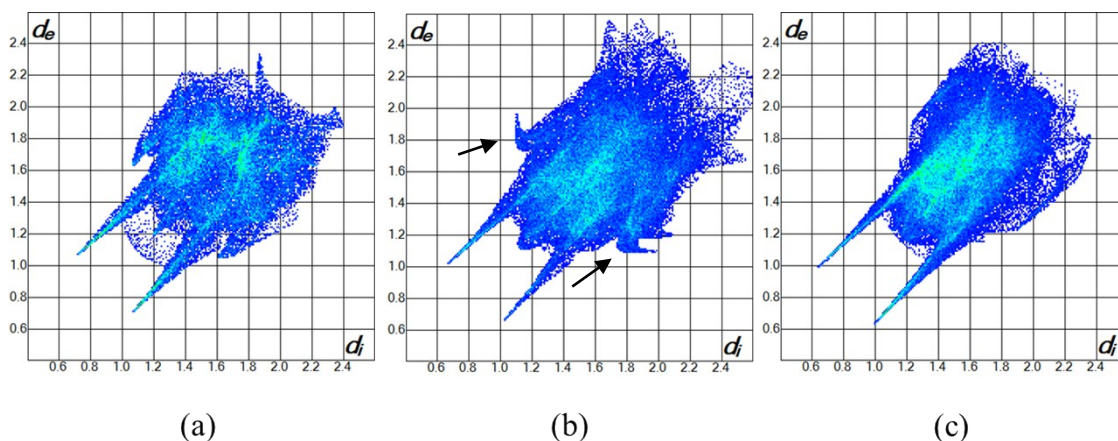

Figure S7. Hirshfeld surface fingerprint plots for (a) 4-hydroxyphenylboronic acid, (b)  $(\epsilon\text{-caprolactam})_2 \cdot 4\text{-hydroxyphenylboronic acid}$  and (c)  $1 \cdot 2\text{B}(\text{OH})_3$ . Prominent 'wings' in 'b' (arrows) represent  $\text{CH} \cdots \pi$  interactions.

Commercial 4-hydroxyphenylboronic acid (purchased from TCI) contained good quality single crystals, and the single crystal X-ray structural analysis was undertaken for completeness. The asymmetric unit of this boronic acid contains two independent molecules ( $Z' = 2$ ) with hydrogen bonding interactions between the hydroxyl moieties ( $\text{O}(3) \cdots \text{O}(4)$  2.836(2) Å), as seen in Fig. S8. The boronic acid units form conventional 8-membered hydrogen bonded rings while the hydroxyl groups form a 1D hydrogen bonded chain. The  $Z' > 1$  structure is common for monoalcohols<sup>1</sup> and is consistent with the increased tendency for molecule with a parent structure with high  $Z'$  to form co-crystals.<sup>2</sup>

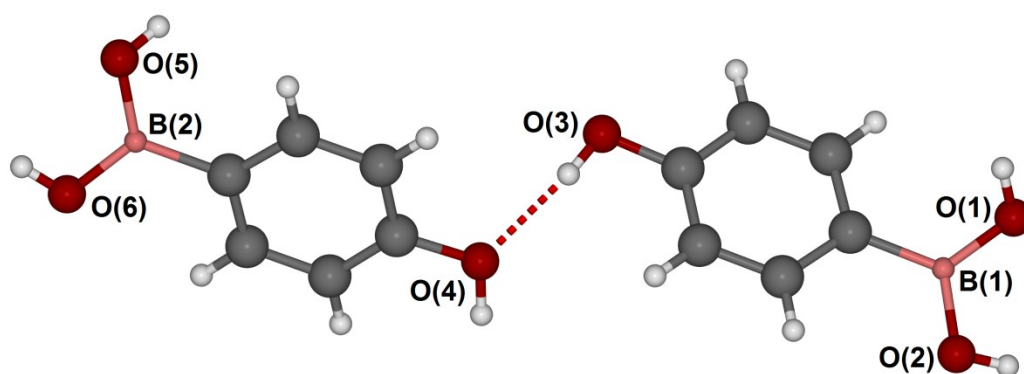

Figure S8. Asymmetric unit of 4-hydroxyphenylboronic acid.

The BOH groups of neighbouring molecules are held by hydrogen bonding interactions in a *syn-anti* conformation, resulting in an overall tape arrangement, Fig. S9.

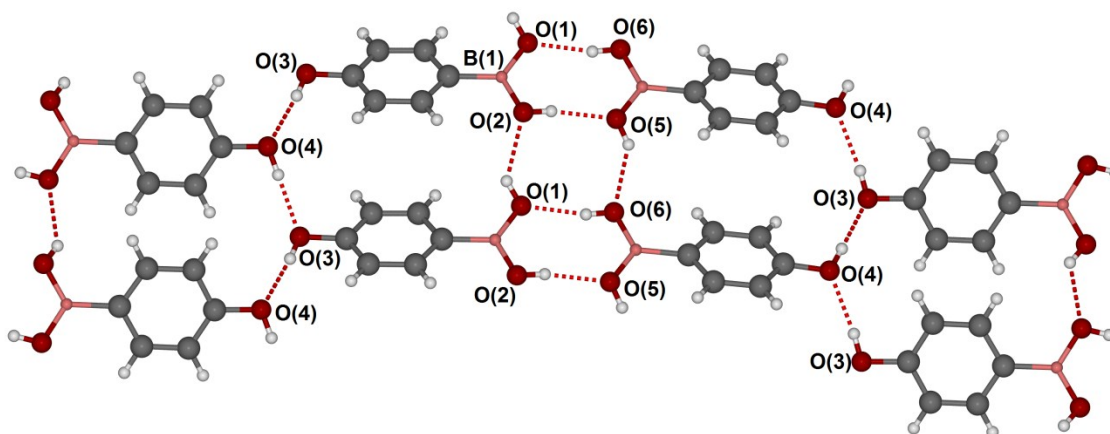

Figure S9. Crystallographic packing in 4-hydroxyphenylboronic acid. Hydrogen bonding distances (Å) (D...A): O(1)···O(2) 2.784(2), O(1)···O(6) 2.746(2), O(2)···O(5) 2.757(2), O(3)···O(4) 2.836(2), O(4)···O(3) 2.815(2), O(5)···O(6) 2.781(2) Å.

Crystal data for 4-hydroxyphenylboronic acid,  $M = 137.93$ , colourless trapezoid,  $0.4094 \times 0.1855 \times 0.1143 \text{ mm}^3$ , monoclinic, space group  $P2_1/c$  (No. 14),  $a = 14.3765(4) \text{ Å}$ ,  $b = 5.04525(19) \text{ Å}$ ,  $c = 17.3563(7) \text{ Å}$ ,  $\alpha = 90^\circ$ ,  $\beta = 90.695(3)^\circ$ ,  $\gamma = 90^\circ$ ,  $V = 1258.81(8) \text{ Å}^3$ ,  $Z = 8$ ,  $D_c = 1.457 \text{ g/cm}^3$ ,  $F_{000} = 574.000$ , Xcalibur, Sapphire3, MoK $\alpha$  radiation,  $\lambda = 0.71073 \text{ Å}$ ,  $T = 120\text{K}$ ,  $2\theta_{\text{max}} = 52.0^\circ$ , 15899 reflections collected, 2475 unique ( $R_{\text{int}} = 0.0445$ ). Final  $\text{Goof} = 1.088$ ,  $R1 = 0.0438$ ,  $wR2 = 0.1088$ ,  $R$  indices based on 2036 reflections with  $I > 2\sigma(I)$  (refinement on  $F^2$ ), 193 parameters, 0 restraints.  $Lp$  and absorption corrections applied,  $\mu = 0.113 \text{ mm}^{-1}$ .

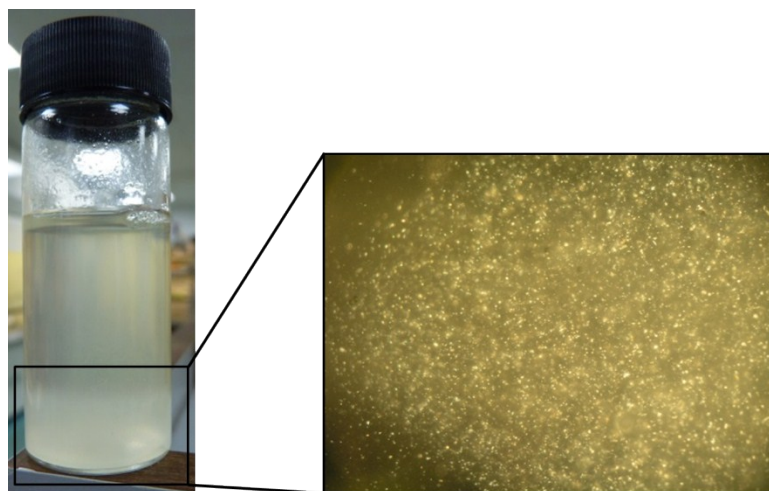

Figure S10. Sample vial showing biphasic  $1\cdot 2\text{B}(\text{OH})_3$ -guar mixture prepared on a molar equivalent boron basis of the co-crystal after 3 days standing. Pop-out image shows the polarised optical micrograph of the crystalline material produced in the lower layer.

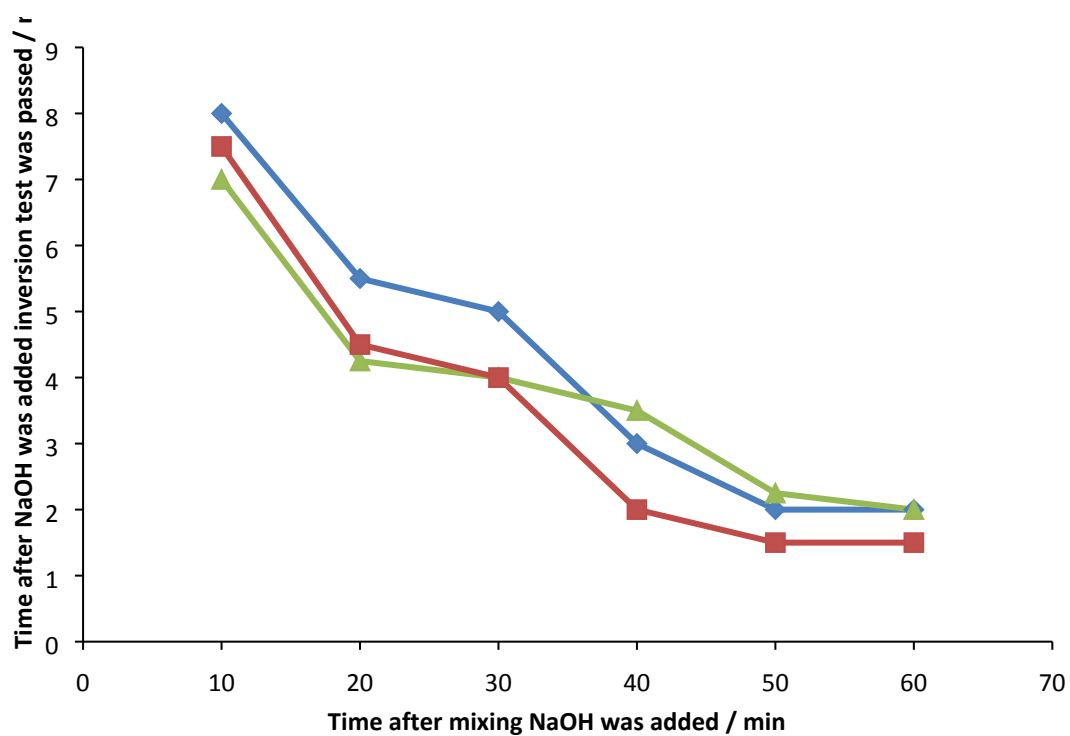

Figure S11. Average gelation time over two experiments of samples containing boric acid (♦),  $1\cdot 2\text{B}(\text{OH})_3$  (◻) or  $2\cdot \text{B}(\text{OH})_3$  (◼) with varying times before addition of NaOH.

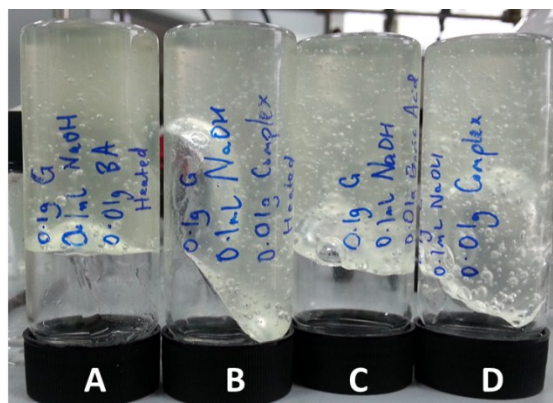

Figure S12. Cross-linked guar gels upon vial inversion. Samples A and B are heated, C and D gelled at room temperature. Initially the boric acid cross-linked gels A and C are more viscous than those cross-linked with the same mass of the co-crystal  $1 \cdot 2\text{B}(\text{OH})_3$ , however on standing the mixtures reach similar viscosity.

## References

1. C. P. Brock and L. L. Duncan, *Chem. Mater.*, 1994, **6**, 1307.
2. K. M. Anderson, M. R. Probert, C. N. Whiteley, A. M. Rowland, A. E. Goeta and J. W. Steed, *Cryst. Growth. Des.*, 2009, **9**, 1082.
